# Supplementary material for: Self-assembly of stable oligomeric and fibrillar aggregates of Aβ peptides relevant to Alzheimer's disease: morphology dependent Cu/heme toxicity and inhibition of PROS generation
Source: Royal Society of Chemistry journal article supplement (doi:10.1039/c4dt01991a), 2014-07-14
Supplement: c4dt01991a1.pdf [file c4dt01991a1.pdf]

*Supplementary Information*

**Self Assembly of Stable Oligomeric and Fibrillar  
Aggregates of A $\beta$  Peptides Relevant to  
Alzheimers' Disease: Morphology Dependent  
Cu/Heme Toxicity and Inhibition of PROS  
Generation**

Kushal Sengupta<sup>‡</sup>, Sudipta Chatterjee<sup>‡</sup>, Debajyoti Pramanik, Somdatta Ghosh Dey\*,  
Abhishek Dey\*

Department of Inorganic Chemistry, Indian Association for the Cultivation of Science,  
2A & 2B Raja S. C. Mullick Road, Jadavpur, Kolkata, 700032

## Figures

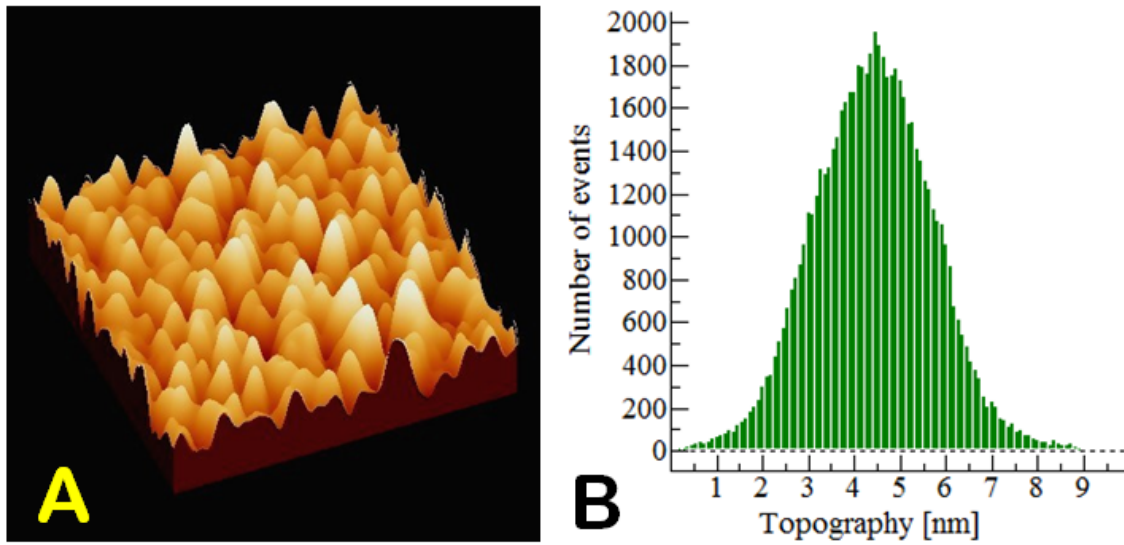

**Supplementary Figure S1.** (A) AFM image of  $A\beta_{Cys}$  assembled on Au electrode showing isolated structures of the  $A\beta_{Cys}$  peptides in presence of  $C_8SH$  as diluent ( $A\beta_{C_8SH}$ ). (B) is the height distribution profile diagram of the same.

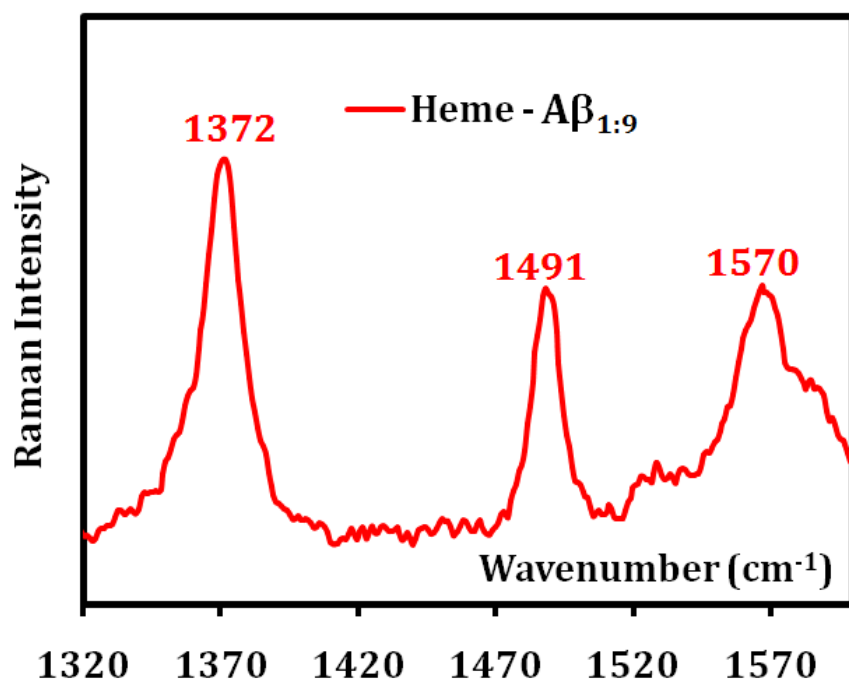

**Supplementary Figure S2.** SERRS-RDE data of heme-Aβ<sub>1:9</sub> modified electrodes in pH 7 buffer under oxidizing potential (i.e. resting state).

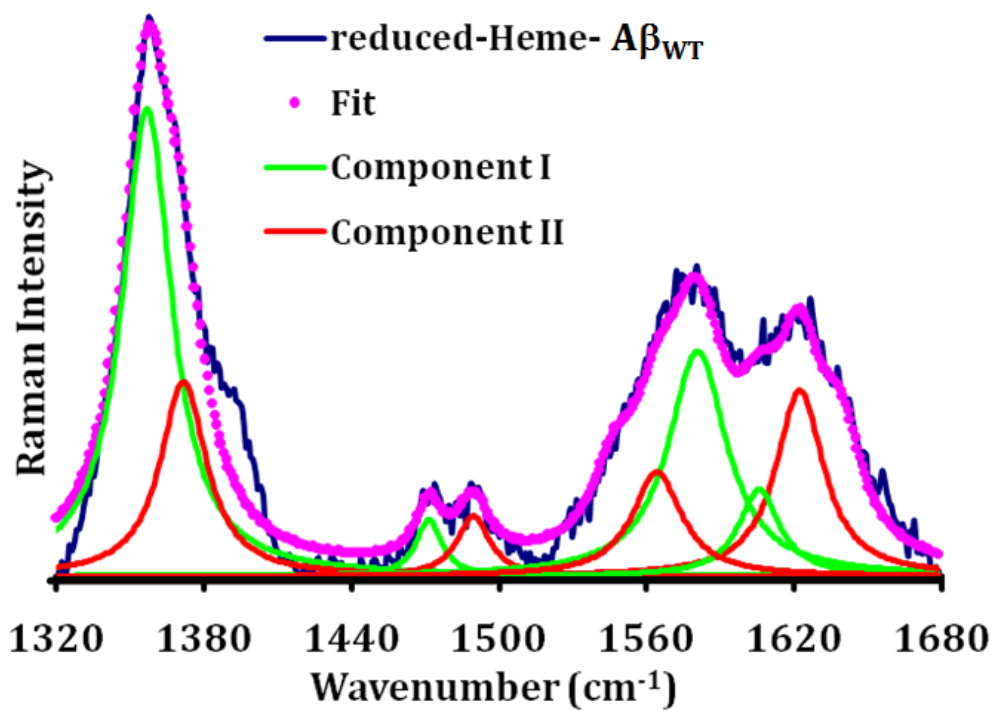

**Supplementary Figure S3.** SERRS-RDE data of heme-A $\beta_{WT}$  at a reducing potential of -0.3 V vs. NHE. The Lorentzian fits of the marker bands show the two components, HS Fe<sup>II</sup> (green) and residual HS Fe<sup>III</sup> (red) species.

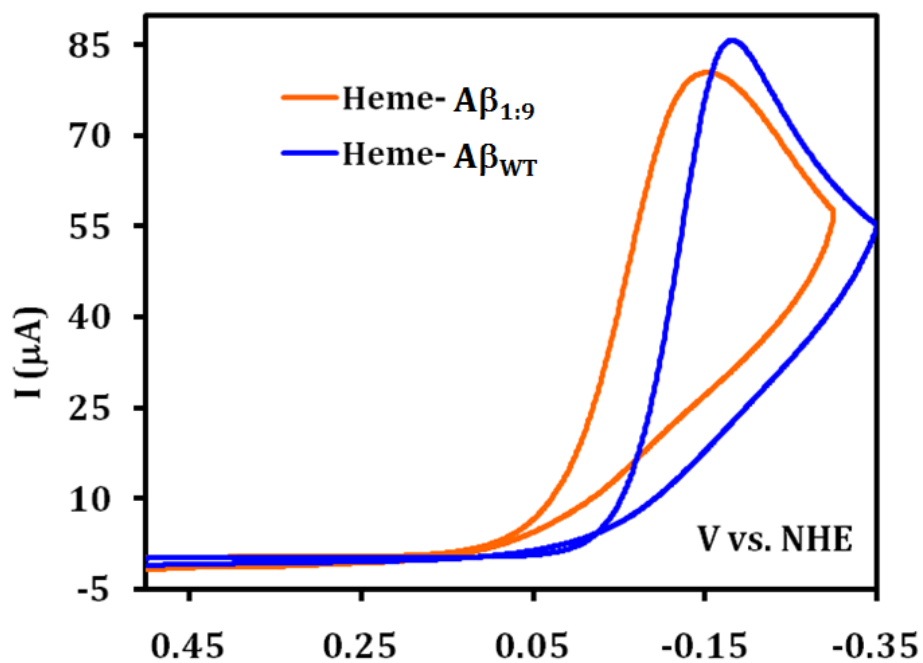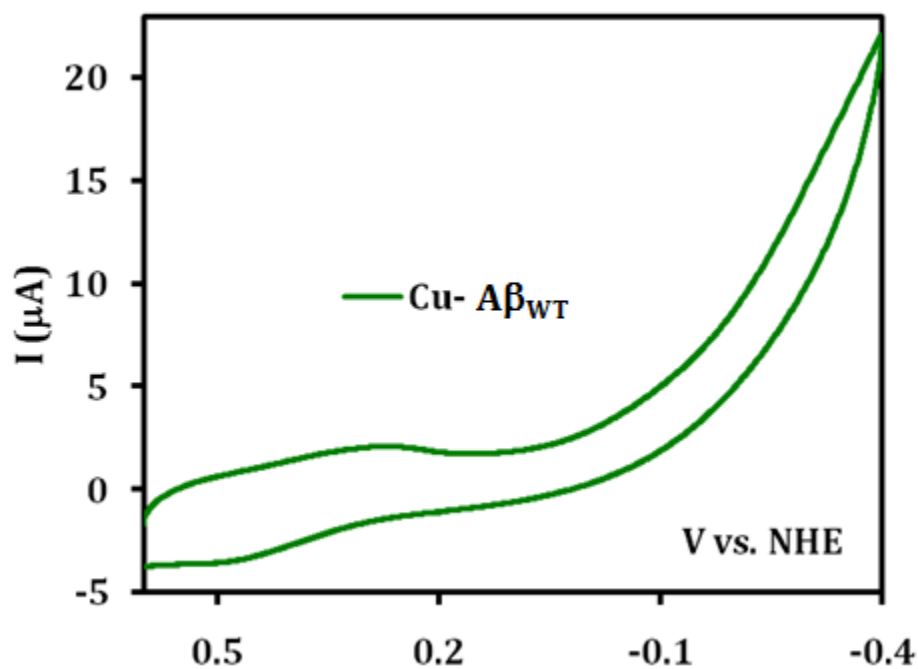

**Supplementary Figure S4.** CV data of heme- $A\beta_{WT}$  (blue) and heme- $A\beta_{1:9}$  (orange) (top), and Cu- $A\beta_{WT}$  (bottom) modified electrodes in air saturated pH 7 buffer at a scan rate of 50 mV/s using Ag/AgCl as reference and Pt wire as counter electrodes respectively.

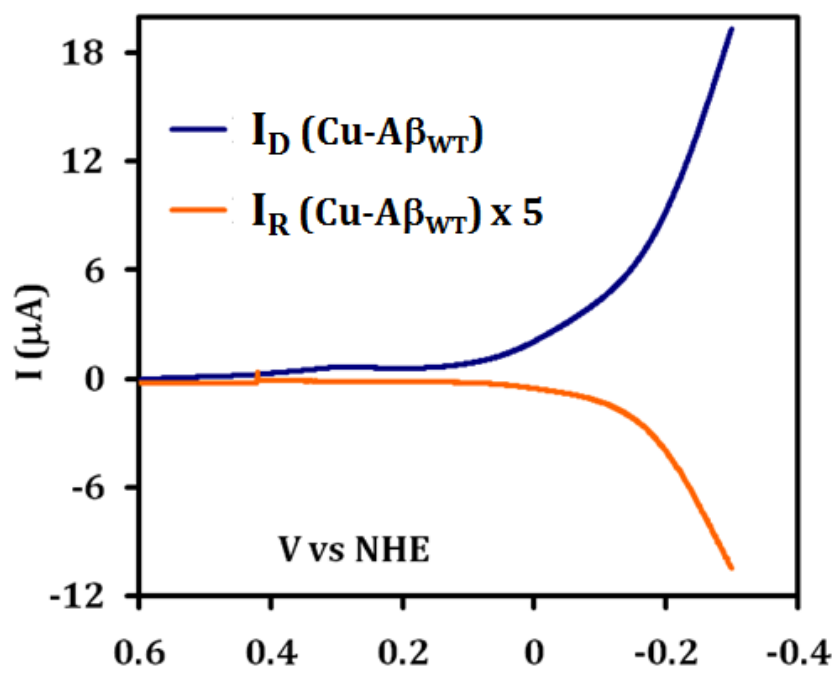

**Supplementary Figure S5.** RRDE plots of Cu bound species showing the disc ( $I_D$ ) and ring ( $I_R$ ) currents.
